# Supplementary material for: Neutral tricoordinated beryllium(0) compounds – isostructural to BH3 but isoelectronic to NH3
Source: Royal Society of Chemistry journal article supplement (doi:10.1039/c3dt32749c), 2013-01-01
Supplement: c3dt32749c.pdf [file c3dt32749c.pdf]

## Supporting Information for:

### Neutral Tricoordinated Beryllium (0) Compounds – Isostructural to BH<sub>3</sub> but Isoelectronic to NH<sub>3</sub>

Susmita De and Pattiyil Parameswaran\*<sup>[a]</sup>

<sup>[a]</sup>Department of Chemistry, National Institute of Technology Calicut,  
Kozhikode, Kerala, India -673 601.  
e-mail: param@nitc.ac.in

**Figure S1:** Optimized equilibrium geometry of Be(NHC)<sub>3</sub>, indicating the orientation of the NHC rings at the BP86/TZVPP level of theory.

**Table S1:** Total energies at BP86/TZVPP level ( $E_{\text{BP86}}$ , in au), zero point energy at BP86/TZVPP level ( $E_{\text{ZPE(BP86)}}$ , in au), total energies at M06/TZVPP//BP86/TZVPP level ( $E_{\text{M06}}$ , in au) and optimized Cartesian coordinates of all calculated molecules using G09 program package.

**Figure S2:** Optimized geometries of some BeL<sub>3</sub> molecules (L = CO (**1**), NHC (**2**) and PMe<sub>3</sub> (**3**)) and its protonated, BH<sub>3</sub> and W(CO)<sub>5</sub> adducts at the M06/TZVPP level of theory. Distances are given in Å and angles are given in deg. The point group symmetry and the pyramidalization angle  $\theta$  around Be are given.

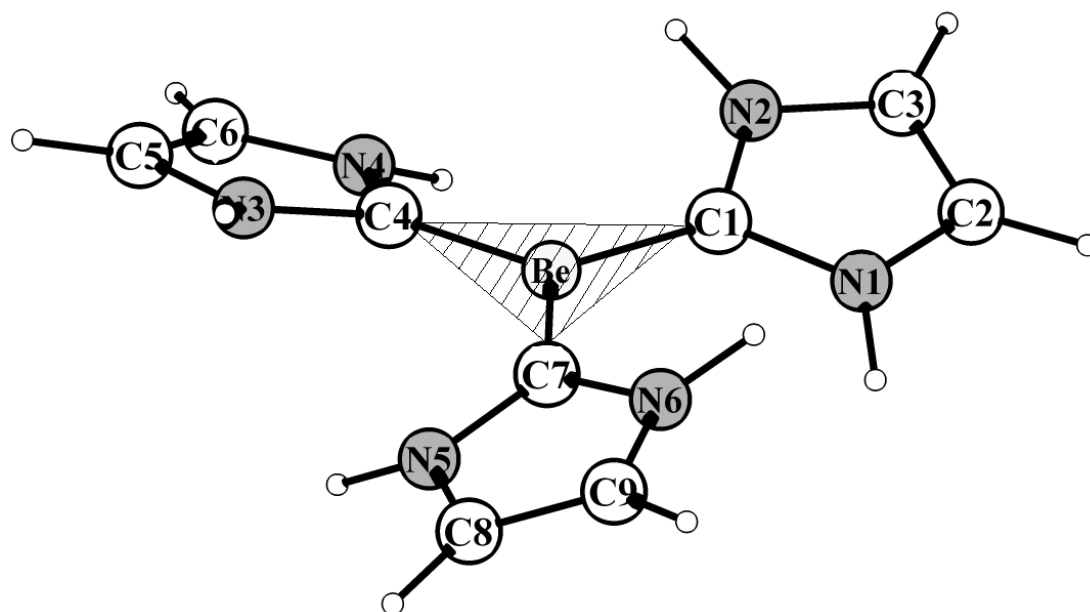

Be-C1-C4-C7 = 0.0°

N1-C1-Be-C7 = N4-C4-Be-C7 = 18.0°, N2-C1-Be-C7 = N3-C4-Be-C7 = 18.2° and  
N5-C7-Be-C4 = N6-C7-Be-C4 = 17.2°

**Figure S1:** Optimized equilibrium geometry of Be(NHC)<sub>3</sub>, indicating the orientation of the NHC rings at the BP86/TZVPP level of theory.

**Table S1:** Total energies at BP86/TZVPP level ( $E_{BP86}$ , in au), zero point energy at the BP86/TZVPP level ( $E_{ZPE(BP86)}$ , in au), total energies at the M06/TZVPP//BP86/TZVPP level ( $E_{M06}$ , in au) and optimized Cartesian coordinates of all calculated molecules using G09 program package.

### 1

|                   |                |          |         |
|-------------------|----------------|----------|---------|
| $E_{BP86} =$      | -354.869029269 |          |         |
| $E_{ZPE(BP86)} =$ | 0.025027269    |          |         |
| $E_{M06} =$       | -354.670345075 |          |         |
| Be                | 0.00000        | 0.00000  | 0.00000 |
| C                 | 0.00000        | 1.65770  | 0.00000 |
| O                 | 0.00000        | 2.81225  | 0.00000 |
| C                 | 1.43561        | -0.82885 | 0.00000 |
| O                 | 2.43548        | -1.40613 | 0.00000 |
| C                 | -1.43561       | -0.82885 | 0.00000 |
| O                 | -2.43548       | -1.40613 | 0.00000 |

### 1-H<sup>+</sup>

|                   |                |          |          |
|-------------------|----------------|----------|----------|
| $E_{BP86} =$      | -355.200710463 |          |          |
| $E_{ZPE(BP86)} =$ | 0.031528463    |          |          |
| $E_{M06} =$       | -355.021153264 |          |          |
| Be                | 0.00000        | 0.00000  | 0.39465  |
| C                 | 0.00000        | 1.72519  | -0.01807 |
| O                 | 0.00000        | 2.84707  | -0.12582 |
| C                 | -1.49406       | -0.86260 | -0.01807 |
| O                 | -2.46564       | -1.42354 | -0.12582 |
| C                 | 1.49406        | -0.86260 | -0.01807 |
| O                 | 2.46564        | -1.42354 | -0.12582 |
| H                 | 0.00000        | 0.00000  | 1.76627  |

### 1-BH<sub>3</sub>

|                   |                |          |          |
|-------------------|----------------|----------|----------|
| $E_{BP86} =$      | -381.499673807 |          |          |
| $E_{ZPE(BP86)} =$ | 0.053536807    |          |          |
| $E_{M06} =$       | -381.290673702 |          |          |
| Be                | 0.00250        | -0.00050 | -0.34899 |
| C                 | 1.64629        | -0.29787 | -0.37593 |
| O                 | 2.77042        | -0.50165 | -0.27989 |
| C                 | -0.56191       | 1.57144  | -0.38391 |
| O                 | -0.94887       | 2.64687  | -0.29351 |
| C                 | -1.07794       | -1.27411 | -0.39439 |
| O                 | -1.81804       | -2.14573 | -0.31122 |
| H                 | -1.18344       | 0.21311  | 2.04733  |
| H                 | 0.39277        | -1.12071 | 2.05687  |
| H                 | 0.75969        | 0.91144  | 2.05750  |
| B                 | -0.00914       | 0.00108  | 1.84733  |

### 1-W(CO)<sub>5</sub>

|                   |                |  |  |
|-------------------|----------------|--|--|
| $E_{BP86} =$      | -989.157820125 |  |  |
| $E_{ZPE(BP86)} =$ | 0.065650125    |  |  |
| $E_{M06} =$       | -988.4996017   |  |  |

|    |          |          |          |
|----|----------|----------|----------|
| Be | -2.16872 | -0.02437 | -0.03852 |
| C  | -2.38370 | 1.60921  | -0.38774 |
| O  | -2.48963 | 2.72594  | -0.62720 |
| C  | -2.34141 | -0.54332 | 1.55492  |
| O  | -2.41662 | -0.89735 | 2.64322  |
| C  | -2.36613 | -1.13898 | -1.28446 |
| O  | -2.45949 | -1.90051 | -2.13741 |
| W  | 0.49662  | 0.00364  | 0.00195  |
| C  | 0.62887  | -1.12182 | -1.71731 |
| C  | 0.56108  | 1.70897  | -1.15168 |
| C  | 2.48757  | 0.04103  | 0.13994  |
| C  | 0.36253  | 1.15229  | 1.70826  |
| C  | 0.47742  | -1.73118 | 1.11488  |
| O  | 0.71741  | -1.75368 | -2.68464 |
| O  | 3.64590  | 0.06364  | 0.22579  |
| O  | 0.30485  | 1.80285  | 2.66629  |
| O  | 0.49538  | -2.71026 | 1.73512  |
| O  | 0.62318  | 2.66574  | -1.80259 |

## 2

$$E_{\text{BP86}} = -693.636277601$$

$$E_{\text{ZPE(BP86)}} = 0.211841601$$

$$E_{\text{M06}} = -693.129313413$$

|    |          |          |          |
|----|----------|----------|----------|
| Be | 0.00000  | 0.00000  | -0.00397 |
| N  | 0.43983  | -0.98682 | 2.59463  |
| C  | 0.00000  | 0.00000  | 1.70086  |
| C  | 0.28792  | -0.61561 | 3.92843  |
| C  | -0.28792 | 0.61561  | 3.92843  |
| N  | -0.43983 | 0.98682  | 2.59463  |
| H  | -1.01696 | 1.75627  | 2.28229  |
| H  | -0.59227 | 1.24657  | 4.75489  |
| H  | 0.59227  | -1.24657 | 4.75489  |
| H  | 1.01696  | -1.75627 | 2.28229  |
| N  | -0.54238 | 1.68894  | -2.18913 |
| C  | -0.17671 | 1.46702  | -0.85415 |
| C  | -0.59532 | 3.04129  | -2.51817 |
| C  | -0.23008 | 3.72933  | -1.40428 |
| N  | 0.00000  | 2.78431  | -0.40716 |
| H  | 0.47914  | 2.98132  | 0.46135  |
| H  | -0.12306 | 4.79536  | -1.24325 |
| H  | -0.88048 | 3.39885  | -3.50032 |
| H  | -0.95073 | 0.95247  | -2.74890 |
| N  | 0.54238  | -1.68894 | -2.18913 |
| C  | 0.17671  | -1.46702 | -0.85415 |
| C  | 0.59532  | -3.04129 | -2.51817 |
| C  | 0.23008  | -3.72933 | -1.40428 |
| N  | 0.00000  | -2.78431 | -0.40716 |
| H  | -0.47914 | -2.98132 | 0.46135  |
| H  | 0.12306  | -4.79536 | -1.24325 |
| H  | 0.88048  | -3.39885 | -3.50032 |

|   |         |          |          |
|---|---------|----------|----------|
| H | 0.95073 | -0.95247 | -2.74890 |
|---|---------|----------|----------|

### 2-H<sup>+</sup>

E<sub>BP86</sub> = -694.130355637

E<sub>ZPE(BP86)</sub> = 0.225709637

E<sub>M06</sub> = -693.637146563

|    |          |          |          |
|----|----------|----------|----------|
| Be | 0.00005  | 0.01581  | -0.52382 |
| N  | 2.25693  | -1.45800 | -1.01561 |
| C  | 1.52825  | -0.84701 | -0.04693 |
| C  | 3.37466  | -2.11037 | -0.52488 |
| C  | 3.36434  | -1.90389 | 0.82423  |
| N  | 2.23706  | -1.13436 | 1.08176  |
| H  | 1.95955  | -0.82264 | 2.00550  |
| H  | 4.04713  | -2.23170 | 1.59855  |
| H  | 4.07036  | -2.65313 | -1.15270 |
| H  | 1.94901  | -1.39996 | -1.98482 |
| N  | -2.25532 | -1.46051 | -1.01564 |
| C  | -1.52701 | -0.84915 | -0.04693 |
| C  | -3.37209 | -2.11448 | -0.52481 |
| C  | -3.36154 | -1.90860 | 0.82439  |
| N  | -2.23503 | -1.13791 | 1.08190  |
| H  | -1.95762 | -0.82622 | 2.00567  |
| H  | -4.04366 | -2.23756 | 1.59881  |
| H  | -4.06740 | -2.65770 | -1.15266 |
| H  | -1.94773 | -1.40189 | -1.98492 |
| N  | -1.06259 | 2.62464  | -0.05389 |
| C  | -0.00122 | 1.77684  | -0.13844 |
| C  | -0.68385 | 3.95573  | 0.05967  |
| C  | 0.67836  | 3.95671  | 0.05950  |
| N  | 1.05901  | 2.62617  | -0.05413 |
| H  | 2.01884  | 2.30563  | -0.11715 |
| H  | 1.38803  | 4.77153  | 0.12966  |
| H  | -1.39469 | 4.76950  | 0.13002  |
| H  | -2.02196 | 2.30259  | -0.11638 |
| H  | 0.00012  | -0.13661 | -1.94975 |

### 2-BH<sub>3</sub>

E<sub>BP86</sub> = -720.303605239

E<sub>ZPE(BP86)</sub> = 0.242932239

E<sub>M06</sub> = -719.785534217

|    |          |          |          |
|----|----------|----------|----------|
| Be | -0.00010 | 0.01154  | 0.11909  |
| N  | -1.98559 | -1.83088 | 0.63644  |
| C  | -1.50858 | -0.86410 | -0.19751 |
| C  | -3.23363 | -2.29618 | 0.26583  |
| C  | -3.58178 | -1.61110 | -0.86237 |
| N  | -2.51958 | -0.74747 | -1.12123 |
| H  | -2.44473 | -0.13960 | -1.92771 |
| H  | -4.47065 | -1.66254 | -1.47924 |
| H  | -3.77178 | -3.05455 | 0.82155  |
| H  | -1.48418 | -1.97364 | 1.52331  |

|   |          |          |          |
|---|----------|----------|----------|
| N | 1.98818  | -1.82697 | 0.63856  |
| C | 1.50978  | -0.86231 | -0.19698 |
| C | 3.23649  | -2.29174 | 0.26833  |
| C | 3.58360  | -1.60829 | -0.86119 |
| N | 2.52042  | -0.74618 | -1.12115 |
| H | 2.44440  | -0.14035 | -1.92905 |
| H | 4.47240  | -1.65975 | -1.47817 |
| H | 3.77568  | -3.04846 | 0.82530  |
| H | 1.48672  | -1.96940 | 1.52547  |
| N | 1.06871  | 2.60481  | -0.09125 |
| C | -0.00109 | 1.72931  | -0.13812 |
| C | 0.67768  | 3.93011  | 0.08181  |
| C | -0.68154 | 3.92909  | 0.08631  |
| N | -1.07187 | 2.60331  | -0.08436 |
| H | -2.01749 | 2.26677  | 0.04374  |
| H | -1.38757 | 4.74469  | 0.18139  |
| H | 1.38315  | 4.74672  | 0.17211  |
| H | 2.01593  | 2.26982  | 0.02869  |
| H | 0.00000  | -1.36094 | 2.29867  |
| H | 1.02809  | 0.35682  | 2.66175  |
| H | -1.03191 | 0.35492  | 2.65986  |
| B | -0.00103 | -0.10035 | 2.18403  |

## 2-W(CO)<sub>5</sub>

$$E_{\text{BP86}} = -1327.98970611$$

$$E_{\text{ZPE(BP86)}} = 0.25762911$$

$$E_{\text{M06}} = -1327.0267119$$

|    |          |          |          |
|----|----------|----------|----------|
| Be | -1.24032 | 0.13259  | -0.15573 |
| N  | -2.11270 | -0.61294 | 2.46691  |
| C  | -2.03703 | 0.29133  | 1.44500  |
| C  | -2.71908 | -0.08792 | 3.59689  |
| C  | -3.07716 | 1.18976  | 3.28377  |
| N  | -2.66096 | 1.38729  | 1.97404  |
| H  | -2.77207 | 2.24744  | 1.44939  |
| H  | -3.57231 | 1.95392  | 3.86944  |
| H  | -2.83748 | -0.65073 | 4.51443  |
| H  | -1.58039 | -1.48923 | 2.43875  |
| N  | -1.66033 | -1.89987 | -2.16940 |
| C  | -2.04747 | -1.18446 | -1.07476 |
| C  | -2.59170 | -2.85897 | -2.53279 |
| C  | -3.63012 | -2.74301 | -1.65633 |
| N  | -3.27490 | -1.71957 | -0.78925 |
| H  | -3.83652 | -1.38420 | -0.01498 |
| H  | -4.56041 | -3.29138 | -1.57734 |
| H  | -2.43757 | -3.53908 | -3.36140 |
| H  | -0.69101 | -1.87618 | -2.51735 |
| N  | -1.51990 | 1.94653  | -2.33399 |
| C  | -1.24949 | 1.68569  | -1.01829 |
| C  | -1.30566 | 3.27806  | -2.67377 |
| C  | -0.91035 | 3.89635  | -1.52749 |

|   |          |          |          |
|---|----------|----------|----------|
| N | -0.91136 | 2.92510  | -0.53509 |
| H | -0.46624 | 3.02239  | 0.38313  |
| H | -0.62469 | 4.92409  | -1.34184 |
| H | -1.44073 | 3.66034  | -3.67750 |
| H | -1.79961 | 1.22010  | -2.98195 |
| W | 1.52567  | -0.29367 | 0.19226  |
| C | 1.35476  | -1.48114 | -1.42363 |
| O | 1.14627  | -2.08597 | -2.42470 |
| C | 2.10591  | 1.13807  | -1.16008 |
| O | 2.39445  | 1.95131  | -1.94681 |
| C | 3.39878  | -0.68897 | 0.78781  |
| O | 4.47934  | -0.93200 | 1.15905  |
| C | 1.01307  | 1.27042  | 1.36913  |
| O | 0.63279  | 2.26953  | 1.88516  |
| C | 0.65978  | -1.67589 | 1.39718  |
| O | 0.08172  | -2.44756 | 2.08290  |

### 3

$$E_{\text{BP86}} = -1398.30268168$$

$$E_{\text{ZPE(BP86)}} = 0.33362268$$

$$E_{\text{M06}} = -1397.84355136$$

|    |          |          |          |
|----|----------|----------|----------|
| Be | 0.00500  | -0.00338 | -0.14617 |
| P  | 0.35187  | 2.00942  | -0.03202 |
| P  | 1.56919  | -1.31694 | -0.03019 |
| P  | -1.91581 | -0.69233 | -0.00140 |
| C  | 2.57248  | -1.50911 | 1.53812  |
| H  | 3.36748  | -2.26889 | 1.45568  |
| H  | 3.03084  | -0.54239 | 1.79053  |
| H  | 1.88965  | -1.77421 | 2.35641  |
| C  | 1.07268  | -3.07728 | -0.29826 |
| H  | 0.32032  | -3.37140 | 0.44532  |
| H  | 0.64531  | -3.19087 | -1.30170 |
| H  | 1.94257  | -3.74165 | -0.19646 |
| C  | -2.45646 | -2.07904 | -1.11192 |
| H  | -2.30380 | -1.77529 | -2.15501 |
| H  | -1.83523 | -2.96446 | -0.92094 |
| H  | -3.51153 | -2.34847 | -0.94842 |
| C  | -2.59773 | -1.34625 | 1.61389  |
| H  | -2.50056 | -0.55713 | 2.37172  |
| H  | -3.64954 | -1.67076 | 1.54699  |
| H  | -1.98033 | -2.19425 | 1.94166  |
| C  | -3.19037 | 0.59403  | -0.37515 |
| H  | -3.06865 | 1.45098  | 0.30056  |
| H  | -3.07023 | 0.93777  | -1.40948 |
| H  | -4.20282 | 0.18651  | -0.24138 |
| C  | -0.48097 | 3.15075  | -1.24116 |
| H  | -0.20735 | 2.84798  | -2.25957 |
| H  | -1.57055 | 3.05380  | -1.14125 |
| H  | -0.20415 | 4.20373  | -1.07350 |
| C  | -0.02169 | 2.95884  | 1.53497  |

|   |          |          |          |
|---|----------|----------|----------|
| H | 0.54657  | 2.50620  | 2.35826  |
| H | 0.21539  | 4.03333  | 1.46320  |
| H | -1.08937 | 2.84420  | 1.76989  |
| C | 2.12668  | 2.46089  | -0.27551 |
| H | 2.74964  | 1.93578  | 0.46006  |
| H | 2.44308  | 2.16863  | -1.28404 |
| H | 2.27170  | 3.54326  | -0.15020 |
| C | 2.97802  | -1.14808 | -1.23124 |
| H | 2.58267  | -1.22793 | -2.25153 |
| H | 3.43458  | -0.15489 | -1.12149 |
| H | 3.75476  | -1.91159 | -1.06693 |

### 3-H<sup>+</sup>

$$E_{\text{BP86}} = -1398.79623900$$

$$E_{\text{ZPE(BP86)}} = 0.34302300$$

$$E_{\text{M06}} = -1398.34653095$$

|    |          |          |          |
|----|----------|----------|----------|
| Be | 0.00000  | 0.00000  | 0.54241  |
| P  | 0.00000  | 2.10547  | 0.03310  |
| P  | 1.82339  | -1.05274 | 0.03310  |
| P  | -1.82339 | -1.05274 | 0.03310  |
| H  | 0.00000  | 0.00000  | 1.92835  |
| C  | 1.60069  | 2.92547  | 0.40347  |
| H  | 1.89345  | 2.70579  | 1.43822  |
| H  | 2.38428  | 2.55808  | -0.27213 |
| H  | 1.51374  | 4.01370  | 0.27954  |
| C  | -1.18326 | 3.03220  | 1.08179  |
| H  | -2.21148 | 2.71353  | 0.86948  |
| H  | -0.96708 | 2.81770  | 2.13598  |
| H  | -1.10159 | 4.11288  | 0.90156  |
| C  | -0.38219 | 2.67415  | -1.67284 |
| H  | 0.33408  | 2.24139  | -2.38368 |
| H  | -1.39003 | 2.34645  | -1.96061 |
| H  | -0.33605 | 3.76963  | -1.74537 |
| C  | -3.33388 | -0.07650 | 0.40347  |
| H  | -3.29001 | 0.28688  | 1.43822  |
| H  | -3.40750 | 0.78580  | -0.27213 |
| H  | -4.23283 | -0.69592 | 0.27954  |
| C  | -2.03433 | -2.54083 | 1.08179  |
| H  | -1.24425 | -3.27196 | 0.86948  |
| H  | -1.95666 | -2.24637 | 2.13598  |
| H  | -3.01106 | -3.01044 | 0.90156  |
| C  | -2.12478 | -1.66806 | -1.67284 |
| H  | -2.10814 | -0.83138 | -2.38368 |
| H  | -1.33708 | -2.37702 | -1.96061 |
| H  | -3.09657 | -2.17584 | -1.74537 |
| C  | 1.73319  | -2.84897 | 0.40347  |
| H  | 1.39656  | -2.99267 | 1.43822  |
| H  | 1.02323  | -3.34389 | -0.27213 |
| H  | 2.71910  | -3.31778 | 0.27954  |
| C  | 3.21759  | -0.49137 | 1.08179  |



|   |         |          |          |
|---|---------|----------|----------|
| H | 3.45573 | 0.55843  | 0.86948  |
| H | 2.92374 | -0.57133 | 2.13598  |
| H | 4.11265 | -1.10244 | 0.90156  |
| C | 2.50697 | -1.00608 | -1.67284 |
| H | 1.77407 | -1.41002 | -2.38368 |
| H | 2.72710 | 0.03057  | -1.96061 |
| H | 3.43262 | -1.59379 | -1.74537 |

### 3-BH<sub>3</sub>

$$E_{\text{BP86}} = -1424.98713678$$

$$E_{\text{ZPE(BP86)}} = 0.36317878$$

$$E_{\text{M06}} = -1424.52179316$$

|    |          |          |          |
|----|----------|----------|----------|
| Be | 0.00178  | -0.00032 | -0.25178 |
| P  | 2.06988  | -0.07980 | 0.13245  |
| P  | -0.96455 | 1.82904  | 0.13875  |
| P  | -1.10447 | -1.75029 | 0.13093  |
| C  | 2.90153  | 1.48985  | -0.34490 |
| H  | 2.58293  | 1.74631  | -1.36306 |
| H  | 2.61090  | 2.29674  | 0.34099  |
| H  | 3.99417  | 1.37523  | -0.31226 |
| C  | 2.92149  | -1.30991 | -0.93460 |
| H  | 2.67606  | -2.32843 | -0.60701 |
| H  | 2.54999  | -1.17425 | -1.95907 |
| H  | 4.01228  | -1.17771 | -0.89727 |
| C  | 2.85013  | -0.41150 | 1.78707  |
| H  | 2.50887  | 0.34523  | 2.50701  |
| H  | 2.52523  | -1.39504 | 2.15423  |
| H  | 3.95007  | -0.39539 | 1.74237  |
| C  | -0.16062 | -3.25796 | -0.34100 |
| H  | 0.21601  | -3.12095 | -1.36269 |
| H  | 0.68689  | -3.40328 | 0.34224  |
| H  | -0.80463 | -4.14778 | -0.29623 |
| C  | -2.59135 | -1.87498 | -0.94062 |
| H  | -3.34663 | -1.14324 | -0.62606 |
| H  | -2.28063 | -1.63522 | -1.96611 |
| H  | -3.02921 | -2.88230 | -0.89261 |
| C  | -1.78538 | -2.25621 | 1.78452  |
| H  | -0.95998 | -2.35622 | 2.50282  |
| H  | -2.46012 | -1.47253 | 2.15612  |
| H  | -2.33775 | -3.20720 | 1.73649  |
| C  | -2.74266 | 1.76256  | -0.32960 |
| H  | -2.81022 | 1.36652  | -1.35089 |
| H  | -3.29171 | 1.10097  | 0.35373  |
| H  | -3.19256 | 2.76474  | -0.28722 |
| C  | -0.33814 | 3.18463  | -0.93263 |
| H  | 0.67704  | 3.46882  | -0.62720 |
| H  | -0.29868 | 2.80451  | -1.96210 |
| H  | -0.98931 | 4.06842  | -0.87116 |
| C  | -1.05725 | 2.67291  | 1.79228  |
| H  | -1.53628 | 2.00227  | 2.51879  |

|   |          |          |          |
|---|----------|----------|----------|
| H | -0.04024 | 2.88515  | 2.15013  |
| H | -1.62178 | 3.61665  | 1.74717  |
| H | -1.07454 | 0.45373  | -2.64223 |
| H | 0.92818  | 0.70755  | -2.64714 |
| H | 0.14451  | -1.15434 | -2.64373 |
| B | 0.00094  | 0.00234  | -2.24117 |

### 3-W(CO)<sub>5</sub>

$$E_{\text{BP86}} = -2032.64504086$$

$$E_{\text{ZPE(BP86)}} = 0.37637886$$

$$E_{\text{M06}} = -2031.7366415$$

|    |          |          |          |
|----|----------|----------|----------|
| Be | -0.04387 | 1.10023  | 0.00000  |
| P  | -1.10976 | 1.77282  | 1.77083  |
| P  | 1.88017  | 2.18329  | 0.00000  |
| P  | -1.10976 | 1.77282  | -1.77083 |
| C  | -0.46273 | 1.07305  | 3.34267  |
| H  | -0.56687 | -0.01739 | 3.32798  |
| H  | 0.60246  | 1.31068  | 3.45564  |
| H  | -1.01711 | 1.48482  | 4.19817  |
| C  | -2.89346 | 1.32959  | 1.83517  |
| H  | -3.45139 | 1.92043  | 1.09784  |
| H  | -3.03060 | 0.26457  | 1.62192  |
| H  | -3.29402 | 1.55109  | 2.83469  |
| C  | -1.21303 | 3.57316  | 2.21953  |
| H  | -0.21278 | 3.96761  | 2.44074  |
| H  | -1.63287 | 4.14731  | 1.38285  |
| H  | -1.84707 | 3.72305  | 3.10591  |
| C  | -2.89346 | 1.32959  | -1.83517 |
| H  | -3.03060 | 0.26457  | -1.62192 |
| H  | -3.45139 | 1.92043  | -1.09784 |
| H  | -3.29402 | 1.55109  | -2.83469 |
| C  | -0.46273 | 1.07305  | -3.34267 |
| H  | 0.60246  | 1.31068  | -3.45564 |
| H  | -0.56687 | -0.01739 | -3.32798 |
| H  | -1.01711 | 1.48482  | -4.19817 |
| C  | -1.21303 | 3.57316  | -2.21953 |
| H  | -1.63287 | 4.14731  | -1.38285 |
| H  | -0.21278 | 3.96761  | -2.44074 |
| H  | -1.84707 | 3.72305  | -3.10591 |
| C  | 2.98308  | 1.85189  | -1.43229 |
| H  | 3.18660  | 0.77914  | -1.51885 |
| H  | 2.50125  | 2.18216  | -2.36205 |
| H  | 3.92776  | 2.40135  | -1.31255 |
| C  | 2.98308  | 1.85189  | 1.43229  |
| H  | 2.50125  | 2.18216  | 2.36205  |
| H  | 3.18660  | 0.77914  | 1.51885  |
| H  | 3.92776  | 2.40135  | 1.31255  |
| C  | 1.89028  | 4.03843  | 0.00000  |
| H  | 1.37380  | 4.42396  | -0.88816 |
| H  | 1.37380  | 4.42396  | 0.88816  |

|   |          |          |          |
|---|----------|----------|----------|
| H | 2.92313  | 4.41745  | 0.00000  |
| W | 0.09711  | -1.61533 | 0.00000  |
| C | 1.48165  | -1.36685 | 1.48280  |
| C | 0.42273  | -3.58573 | 0.00000  |
| C | -1.36446 | -1.82150 | 1.41306  |
| C | -1.36446 | -1.82150 | -1.41306 |
| C | 1.48165  | -1.36685 | -1.48280 |
| O | 2.25874  | -1.26658 | 2.35310  |
| O | 2.25874  | -1.26658 | -2.35310 |
| O | -2.20854 | -1.98370 | -2.20894 |
| O | -2.20854 | -1.98370 | 2.20894  |
| O | 0.62801  | -4.73495 | 0.00000  |

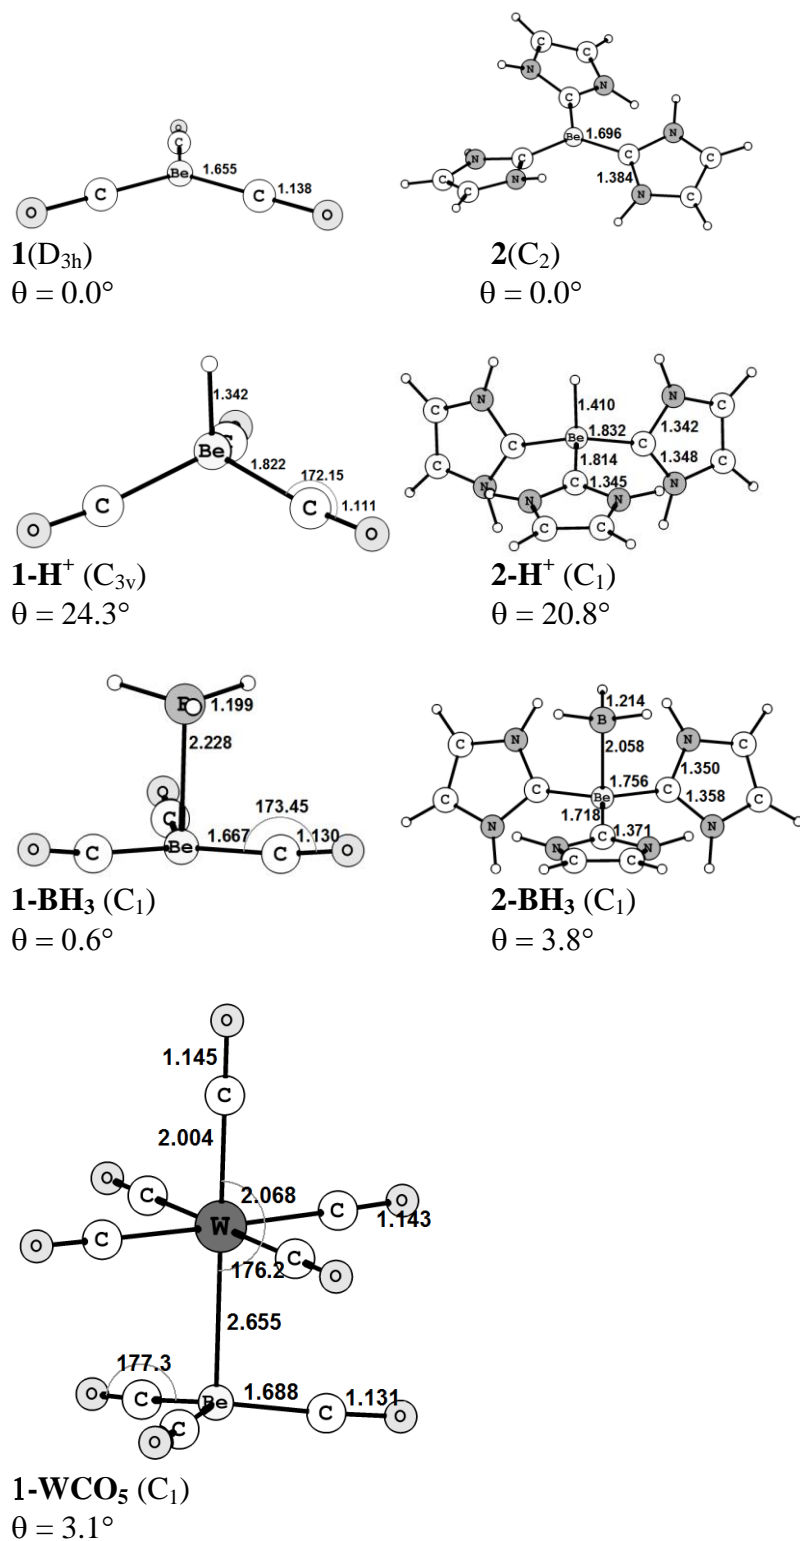

**Figure S2:** Optimized geometries of some BeL<sub>3</sub> molecules (L = CO (**1**), NHC (**2**) and PMe<sub>3</sub> (**3**)) and its protonated, BH<sub>3</sub> and W(CO)<sub>5</sub> adducts at the M06/TZVPP level of theory. Distances are given in Å and angles are given in deg. The point group symmetry and the pyramidalization angle  $\theta$  around Be are given.
